# Supplementary material for: Dietary Protein Patterns during Pregnancy Are Associated with Risk of Gestational Diabetes Mellitus in Chinese Pregnant Women
Source: MDPI journal article supplement (doi:10.3390/nu14081623), 2022-04-13
Supplement: s1 [file s1]

# Dietary protein patterns during pregnancy are associated with risk of gestational diabetes mellitus in Chinese pregnant women

## Supplementary materials

**Supplementary Table S1** Characteristics of pregnant women by dietary protein patterns<sup>1</sup>.

| Characteristics                               | Plant-dairy-eggs<br>(N=302) | White meat<br>(N =297) | Red meat<br>(N =415) | P            |
|-----------------------------------------------|-----------------------------|------------------------|----------------------|--------------|
| GDM, <i>n</i> (%)                             |                             |                        |                      | 0.332        |
| Yes                                           | 49 (16.23)                  | 62 (20.88)             | 80 (19.28)           |              |
| No                                            | 253 (83.77)                 | 235 (79.12)            | 335 (80.72)          |              |
| Age, <i>y</i>                                 | 30.38 ± 5.20                | 29.75 ± 4.70           | 30.03 ± 4.68         | 0.288        |
| < 35, <i>y</i>                                | 237 (78.74)                 | 262 (88.22)            | 352 (84.82)          | <b>0.006</b> |
| ≥35, <i>y</i>                                 | 64 (21.26)                  | 35 (11.78)             | 63 (15.18)           |              |
| Gestational age, <i>week</i>                  | 25.12 ± 2.23                | 25.64 ± 2.41           | 25.55 ± 2.30         | <b>0.016</b> |
| Pre-pregnancy BMI, <i>kg/m</i> <sup>2</sup>   | 21.03 ± 3.05                | 20.42 ± 2.83           | 20.36 ± 2.82         | <b>0.007</b> |
| Overweight or obese, <i>n</i> (%)             | 44 (15.60)                  | 34 (12.19)             | 41 (10.49)           | 0.138        |
| Underweight or normal, <i>n</i> (%)           | 238 (84.40)                 | 245 (87.81)            | 350 (89.51)          |              |
| Smoking, <i>yes, n</i> (%)                    | 9 (3.00)                    | 19 (6.40)              | 16 (3.89)            | 0.106        |
| Alcoholuse, <i>yes, n</i> (%)                 | 14 (4.67)                   | 8 (2.69)               | 13 (3.16)            | 0.379        |
| Physical activity, <i>METs·h/w</i>            | 33.19 ± 27.52               | 31.11 ± 28.46          | 31.09 ± 25.53        | 0.540        |
| Family history of diabetes, <i>yes, n</i> (%) | 45 (14.95)                  | 44 (14.81)             | 61 (14.91)           | 0.999        |
| <b>History of GDM, <i>n</i> (%)</b>           |                             |                        |                      | 0.778        |
| Yes                                           | 9 (3.04)                    | 11 (3.72)              | 9 (2.20)             |              |
| No                                            | 176 (59.46)                 | 168 (56.76)            | 241 (58.92)          |              |
| Nulliparous                                   | 111 (37.50)                 | 117 (39.53)            | 159 (38.88)          |              |
| <b>Educational level, <i>n</i> (%)</b>        |                             |                        |                      | 0.403        |
| Senior high school and below                  | 55 (18.84)                  | 56 (19.24)             | 72 (17.69)           |              |
| High or technical secondary school            | 74 (25.34)                  | 54 (18.56)             | 85 (20.88)           |              |
| Junior college and college                    | 143 (48.97)                 | 166 (57.04)            | 225 (55.28)          |              |
| Postgraduate and above                        | 20 (6.85)                   | 15 (5.15)              | 45 (6.14)            |              |
| <b>Monthly household income, <i>n</i> (%)</b> |                             |                        |                      | 0.442        |
| ≤4000 RMB                                     | 68 (23.21)                  | 56 (19.38)             | 85 (21.25)           |              |
| 4001-6000 RMB                                 | 60 (20.48)                  | 69 (23.88)             | 107 (26.75)          |              |
| 6001-10000 RMB                                | 69 (23.55)                  | 76 (26.30)             | 98 (24.50)           |              |
| > 10000 RMB                                   | 96 (32.76)                  | 88 (30.45)             | 110 (27.50)          |              |

<sup>1</sup> Values were presented as mean± standard deviation, or proportions.

**Supplemental Table S2** Average percentage of total protein intake from individual food group across protein food cluster analysis of 1024 pregnant women from the GDM study<sup>1</sup>

| Food group          | Plant protein | White meat protein | Red meat protein | <i>F</i> | <i>P</i> |
|---------------------|---------------|--------------------|------------------|----------|----------|
| <i>N</i> (GDM),     | 302 (49)      | 297 (62)           | 415 (80)         | 1.10     | 0.332    |
| Grain, %            | 25.61 ± 9.20  | 20.55 ± 7.49       | 25.20 ± 9.31     | 31.84    | <.0001   |
| Beans, %            | 7.17 ± 5.70   | 5.44 ± 4.09        | 5.19 ± 4.12      | 17.61    | <.0001   |
| Vegetables, %       | 8.19 ± 3.87   | 6.33 ± 2.55        | 6.03 ± 2.81      | 46.91    | <.0001   |
| Fruits, %           | 3.62 ± 2.04   | 2.44 ± 1.39        | 2.13 ± 1.23      | 84.44    | <.0001   |
| Red meat, %         | 13.90 ± 6.95  | 18.66 ± 7.83       | 31.50 ± 9.86     | 418.25   | <.0001   |
| Poultry, %          | 3.74 ± 2.95   | 11.18 ± 5.74       | 4.75 ± 2.94      | 318.47   | <.0001   |
| Aquatic products, % | 7.29 ± 5.19   | 14.56 ± 9.17       | 6.90 ± 4.45      | 145.19   | <.0001   |
| Egg, %              | 9.97 ± 6.15   | 5.62 ± 3.63        | 6.48 ± 4.22      | 73.01    | <.0001   |
| Dairy, %            | 13.41 ± 8.16  | 10.48 ± 6.62       | 8.63 ± 6.14      | 41.53    | <.0001   |
| Nuts and Seeds, %   | 6.65 ± 6.75   | 4.28 ± 5.18        | 2.79 ± 3.49      | 49.43    | <.0001   |

<sup>1</sup>A K-means cluster analysis was used to classify participants into mutually exclusive groups; Naming of clusters was determined by the value which represent the highest consumption of one or two food groups compared with other clusters; Percentage of total protein intake across the each food group was used; Mean±SE.

**Supplementary Table S3** Daily nutrients consumption of pregnant women by dietary protein patterns<sup>1</sup>.

| <b>Nutrients<sup>2</sup></b>            | Plant-dairy-eggs | White meat       | Red meat         | <i>P</i>         |
|-----------------------------------------|------------------|------------------|------------------|------------------|
|                                         | (N=302)          | (N =297)         | (N =415)         |                  |
| Total energy, <i>kcal/d</i>             | 1740.76 ± 465.92 | 1841.58 ± 494.08 | 1817.10 ± 515.73 | <b>0.032</b>     |
| Saturated fatty acids, <i>g/d</i>       | 18.80 ± 3.62     | 20.26 ± 3.67     | 20.50 ± 4.37     | <b>&lt;.0001</b> |
| Monounsaturated fatty acids, <i>g/d</i> | 26.47 ± 5.36     | 27.81 ± 5.23     | 28.71 ± 5.92     | <b>&lt;.0001</b> |
| Polyunsaturated fatty acids, <i>g/d</i> | 21.79 ± 6.11     | 21.34 ± 5.83     | 20.07 ± 5.29     | <b>0.0002</b>    |
| Cholesterol, <i>mg/d</i>                | 400.72 ± 169.93  | 415.31 ± 153.19  | 398.36 ± 160.47  | 0.351            |
| Fiber, <i>g/d</i>                       | 12.84 ± 2.97     | 11.12 ± 2.79     | 9.82 ± 2.75      | <b>&lt;.0001</b> |
| Carbohydrates, <i>g/d</i>               | 227.58 ± 27.53   | 210.55 ± 28.69   | 216.31 ± 33.23   | <b>&lt;.0001</b> |
| % Energy                                | 50.37 ± 5.94     | 46.55 ± 6.20     | 47.66 ± 7.06     | <b>&lt;.0001</b> |
| Fat, <i>g/d</i>                         | 72.60 ± 10.66    | 74.87 ± 10.89    | 74.27 ± 12.72    | <b>0.044</b>     |
| % Energy                                | 36.79 ± 5.21     | 37.76 ± 5.65     | 37.60 ± 6.19     | 0.082            |
| Protein, <i>g/d</i>                     | 65.57 ± 8.49     | 76.71 ± 11.52    | 71.76 ± 10.95    | <b>&lt;.0001</b> |
| % Energy                                | 14.18 ± 2.10     | 16.86 ± 2.48     | 15.80 ± 2.48     | <b>&lt;.0001</b> |
| Animal protein, <i>g/d</i>              | 32.50 ± 10.02    | 46.92 ± 12.88    | 42.53 ± 13.16    | <b>&lt;.0001</b> |
| Plant protein, <i>g/d</i>               | 33.09 ± 5.35     | 29.81 ± 4.91     | 29.26 ± 5.54     | <b>&lt;.0001</b> |
| <b>Protein sources</b>                  |                  |                  |                  |                  |
| From grain, <i>g/d</i>                  | 15.76 ± 4.30     | 15.01 ± 4.56     | 17.24 ± 4.72     | <b>&lt;.0001</b> |
| From beans, <i>g/d</i>                  | 4.62 ± 3.82      | 4.27 ± 3.63      | 3.80 ± 3.35      | <b>0.009</b>     |
| From vegetables, <i>g/d</i>             | 5.28 ± 2.68      | 4.84 ± 2.12      | 4.20 ± 2.06      | <b>&lt;.0001</b> |
| From fruits, <i>g/d</i>                 | 2.25 ± 1.12      | 1.83 ± 1.12      | 1.50 ± 0.87      | <b>&lt;.0001</b> |
| From red meat, <i>g/d</i>               | 9.85 ± 5.27      | 14.64 ± 7.46     | 23.06 ± 9.60     | <b>&lt;.0001</b> |
| From poultry, <i>g/d</i>                | 2.61 ± 2.04      | 8.47 ± 4.74      | 3.43 ± 2.43      | <b>&lt;.0001</b> |
| From aquatic products, <i>g/d</i>       | 5.01 ± 3.78      | 11.60 ± 8.87     | 4.98 ± 3.57      | <b>&lt;.0001</b> |
| From eggs, <i>g/d</i>                   | 6.30 ± 3.67      | 4.28 ± 2.94      | 4.66 ± 3.03      | <b>&lt;.0001</b> |
| From dairy, <i>g/d</i>                  | 8.76 ± 5.45      | 7.96 ± 5.04      | 6.43 ± 4.64      | <b>&lt;.0001</b> |
| From nuts and seeds, <i>g/d</i>         | 4.84 ± 4.88      | 3.45 ± 4.17      | 2.17 ± 2.95      | <b>&lt;.0001</b> |

<sup>1</sup> Values were presented as mean± standard deviation.

<sup>2</sup> Energy-adjusted intake estimated by the residual method.

**Supplementary Table S4** Dietary consumption of pregnant women by dietary protein patterns<sup>1</sup>.

| Food groups           | Overall (N=1014) | Plant-dairy-eggs | White meat    | Red meat      | <i>P</i>     |
|-----------------------|------------------|------------------|---------------|---------------|--------------|
|                       |                  | (N=302)          | (N =297)      | (N =415)      |              |
| Grain, g/d            | 202.0 ± 78.5     | 198.9 ± 78.7     | 195.7 ± 77.0  | 208.8 ± 79.1  | 0.066        |
| Beans, g/d            | 21.9 ± 23.2      | 28.3 ± 27.7      | 23.5 ± 23.3   | 16.3 ± 17.6   | <.0001       |
| Vegetables, g/d       | 224.5 ± 128.9    | 239.5 ± 148.2    | 234.2 ± 124.2 | 206.8 ± 114.6 | <b>0.001</b> |
| Fruits, g/d           | 269.6 ± 173.0    | 317.0 ± 180.9    | 281.8 ± 185.4 | 226.6 ± 146.0 | <.0001       |
| Red meat, g/d         | 92.7 ± 61.1      | 51.7 ± 33.6      | 83.8 ± 48.2   | 128.7 ± 63.7  | <.0001       |
| Poultry, g/d          | 26.0 ± 24.6      | 13.4 ± 12.0      | 48.2 ± 29.7   | 19.4 ± 15.1   | <.0001       |
| Aquatic products, g/d | 43.7 ± 41.1      | 30.5 ± 24.1      | 72.9 ± 57.1   | 32.5 ± 22.7   | <.0001       |
| Eggs, g/d             | 39.0 ± 26.7      | 47.7 ± 29.9      | 33.8 ± 23.6   | 36.3 ± 24.8   | <.0001       |
| Dairy, g/d            | 212.9 ± 155.8    | 238.9 ± 163.6    | 226.6 ± 151.0 | 184.3 ± 148.9 | <.0001       |
| Nuts and seeds, g/d   | 12.0 ± 20.3      | 11.1 ± 20.5      | 13.6 ± 18.4   | 11.5 ± 21.4   | 0.255        |

<sup>1</sup> Values were presented as mean± standard deviation.

**Supplementary Table S5** The odds ratios of GDM across three dietary patterns.

| Subgroup            | Dietary Patterns |                            |                            | <i>P</i> <sub>interaction</sub> |
|---------------------|------------------|----------------------------|----------------------------|---------------------------------|
|                     | Plant protein    | White meat protein         | Red meat protein           |                                 |
| Pre-pregnancy BMI   |                  |                            |                            | 0.645                           |
| Obese or overweight | 1.00             | <b>8.043 (1.487-43.49)</b> | <b>8.539 (1.459-49.98)</b> |                                 |
| Normal or thin      | 1.00             | 1.456 (0.774-2.736)        | 1.521 (0.851-2.717)        |                                 |

Participants were categorized into two weight groups according to pre-pregnancy BMI using the Chinese criteria for adults: underweight or normal (<23.9 kg/m<sup>2</sup>), overweight or obese (≥24.0 kg/m<sup>2</sup>).

Model was adjusted for age, gestational age, pre-pregnancy BMI, GDM in a previous pregnancy, family history of diabetes, physical activities, smoking status, alcohol use during pregnancy, dietary energy intake, protein to energy ratio, fat to energy ratio, carbohydrate to energy ratio, fiber, cholesterol, monthly household income, and educational level.

**Supplementary Table S6** The odds ratios of GDM across three dietary patterns when compared to women with red meat protein pattern.

| Model      | Dietary Protein Patterns |                  |                         |
|------------|--------------------------|------------------|-------------------------|
|            | Red meat                 | White meat       | Plant-dairy-eggs        |
| GDM (N,%)  | 80 (19.28%)              | 62 (20.88%)      | 49 (16.23%)             |
| Unadjusted | 1.00                     | 1.11 (0.76-1.60) | 0.81 (0.55-1.20)        |
| Adjusted   |                          |                  |                         |
| Model 1    | 1.00                     | 1.18 (0.79-1.76) | 0.66 (0.43-1.02)        |
| Model 2    | 1.00                     | 1.15 (0.77-1.71) | <b>0.63 (0.41-0.98)</b> |
| Model 3    | 1.00                     | 1.07 (0.70-1.64) | <b>0.55 (0.32-0.92)</b> |
| Model 4    | 1.00                     | 1.02 (0.66-1.58) | <b>0.56 (0.33-0.95)</b> |

Model 1 was adjusted for age, gestational age, pre-pregnancy BMI;

Model 2 was further adjusted for GDM in a previous pregnancy, family history of diabetes;

Model 3 was further adjusted for physical activities, smoking status, alcohol use during pregnancy, dietary energy intake, protein to energy ratio, fat to energy ratio, carbohydrate to energy ratio, fiber, and cholesterol;

Model 4 was further adjusted for monthly household income, and educational level.

**Supplementary Table S7** The odds ratios of GDM across three dietary patterns when compared to women with white meat protein pattern.

| Model      | Dietary Protein Patterns |                  |                         |
|------------|--------------------------|------------------|-------------------------|
|            | White meat               | Red meat         | Plant-dairy-eggs        |
| GDM (N,%)  | 62 (20.88%)              | 80 (19.28%)      | 49 (16.23%)             |
| Unadjusted | 1.00                     | 0.91 (0.62-1.31) | 0.73 (0.49-1.11)        |
| Adjusted   |                          |                  |                         |
| Model 1    | 1.00                     | 0.85 (0.57-1.27) | <b>0.56 (0.35-0.88)</b> |
| Model 2    | 1.00                     | 0.87 (0.58-1.31) | <b>0.55 (0.35-0.88)</b> |
| Model 3    | 1.00                     | 0.94 (0.61-1.43) | <b>0.51 (0.29-0.89)</b> |
| Model 4    | 1.00                     | 0.98 (0.63-1.52) | <b>0.55 (0.31-0.96)</b> |

Model 1 was adjusted for age, gestational age, pre-pregnancy BMI;

Model 2 was further adjusted for GDM in a previous pregnancy, family history of diabetes;

Model 3 was further adjusted for physical activities, smoking status, alcohol use during pregnancy, dietary energy intake, protein to energy ratio, fat to energy ratio, carbohydrate to energy ratio, fiber, and cholesterol;

Model 4 was further adjusted for monthly household income, and educational level.
